# Supplementary material for: Organochlorine Pesticides in Karst Soil: Levels, Distribution, and Source Diagnosis
Source: MDPI journal article supplement (doi:10.3390/ijerph182111589), 2021-11-04
Supplement: s1 [file s1]

## Supplementary Materials for

# Organochlorine pesticides in karst soil: levels, distribution, and source diagnosis

Wei Chen <sup>1,2,3,4</sup>, Faming Zeng <sup>5</sup>, Wei Liu <sup>3</sup>, Jianwei Bu <sup>1</sup>, Guofeng Hu <sup>6</sup>, Songshi Xie <sup>7</sup>, Hongyan Yao <sup>4</sup>, Hong Zhou <sup>3</sup>, Shihua Qi <sup>1,2</sup> and Huanfang Huang <sup>2,8,\*</sup>

1. State Key Laboratory of Biogeology and Environmental Geology, and School of Environmental Studies, Hubei Key Laboratory of Environmental Water Science in the Yangtze River Basin, and Hubei Provincial Engineering Research Center of Systematic Water Pollution Control, China University of Geosciences, Wuhan 430078, China; wei.chen@cug.edu.cn (W.C.); jwbu@cug.edu.cn (J.B.); shihuaqi@cug.edu.cn (S.Q.)
2. State Key Laboratory of Organic Geochemistry, and Guangdong Province Key Laboratory of Environmental Protection and Resources Utilization, and Guangdong-Hong Kong-Macao Joint Laboratory for Environmental Pollution and Control, Guangzhou Institute of Geochemistry, Chinese Academy of Sciences, Guangzhou 510640, China
3. Institute of Geological Survey, China University of Geosciences, Wuhan 430074, China; wliu@cug.edu.cn (W.L.); zhouhong@cug.edu.cn (H.Z.)
4. Ecological Environment Monitoring Station, Ninth Division, Xinjiang Production and Construction Corps, Tacheng, Xinjiang 834601, China; wowoyhy@163.com
5. School of Environmental and Chemical Engineering, Foshan University, Foshan 528000, China; famingzeng@fosu.edu.cn
6. China City Environment Protection Engineering Limited Company (CCEPC), Wuhan 430071, China; 54001@ccepc.com
7. Shandong Institute of Geological Survey, Jinan 250013, China; sdsddy@163.com
8. South China Institute of Environmental Sciences, MEE, Guangzhou 510535, China

\* Correspondence: [hhuanfang@outlook.com](mailto:hhuanfang@outlook.com)

### List of Texts

Text S1. Principle component analysis with multiple linear regression analysis

*Page 3*

Text S2. Carcinogenic risk calculation

*Page 4-6*

## List of Tables

|                                                                                                                                 |         |
|---------------------------------------------------------------------------------------------------------------------------------|---------|
| Table S1. The OCP concentrations (pg/g dw) in the study karst soil.                                                             | Page 7  |
| Table S2. Comparisons of OCPs (pg/g dw) in the agricultural soil between the study karst area and other areas around the world. | Page 8  |
| Table S3. Spearman correlation coefficients between OCP groups.                                                                 | Page 9  |
| Table S4. OCP concentrations in different land use types.                                                                       | Page 9  |
| Table S5. Rotated component matrix.                                                                                             | Page 10 |
| Table S6. The summary of the MLRA model for the OCP data in the study karst soil.                                               | Page 10 |
| Table S7. The ANOVA result for the MLRA.                                                                                        | Page 10 |
| Table S8. The coefficients for the regression equation by MLRA.                                                                 | Page 10 |
| Table S9. The incremental lifetime cancer risk exposure to OCPs in soil from the study karst area.                              | Page 11 |

## List of Figures

|                                                                                                                               |         |
|-------------------------------------------------------------------------------------------------------------------------------|---------|
| Figure S1: Spatial distributions of HCB, HCHs, DDTs, and DRINs in different river basins.                                     | Page 12 |
| Figure S2: Spatial distributions of CHLs and ENDOs in different river basins.                                                 | Page 13 |
| Figure S3: Spatial distributions of Mirex and Methoxychlor in different river basins.                                         | Page 14 |
| Figure S4. The OCP compositions in the soil from the study karst area.                                                        | Page 15 |
| Figure S5. The linear fit between the measured $\log\sum_{25}\text{OCPs}$ and modeled $\log\sum_{25}\text{OCPs}$ by the MLRA. | Page 16 |

## References

Page 17

## Text S1. Principle component analysis with multiple linear regression analysis

The principal component analysis (PCA) with multiple linear regression analysis (MLRA) was widely used to identify and quantify the sources of organic contaminants in the environment. In this study, the PCA followed by MLRA was performed by IBM SPSS Statistics 25. The purpose of PCA is to extract a minimum number of factors (i.e., principal components, PCs) to represent the original OCP data's total variability. During the PCA, each original variable is orthogonal to all others to obtain the smallest possible covariance. Several PCs are

extracted to represent the weighted linear combinations of the original variables. Among them, PCs with eigenvalues greater than one are used to indicate the sources of OCPs. According to the source compositions, the source represented by PCs can be identified by evaluating the factor loading profiles of PCs. It is important to note that the OCP data used in the PCA must meet two assumptions: (1) the original variables are continuous, and (2) variables linearly correlate with each other. The adequacy of the original OCP data can be assessed by the Kaiser-Meyer-Olkin (KMO) and Bartlett's Test. The KMO value generally varies between 0 and 1, and the value higher than 0.6 indicates that the data is adequate and can be used to perform PCA. In the Bartlett's Test, the null hypothesis is that the original data's correlation matrix is perfect. There are no correlations between variables in this perfect matrix, and the original variables cannot be reduced to a few components, i.e., there is no need to extract PCs. Thus, in order to perform PCA, the result of Bartlett's Test for the original OCP data should reject the null hypothesis, i.e., the  $p$ -value of Bartlett's Test should be lower than 0.05. In this study, with the KMO value of 0.63 and the  $p$ -value of Bartlett's Test lower than 0.05 (Table S0-1), the original OCP data was adequate and can be used to perform the PCA.

After the source identification, the MLRA (stepwise) was performed to apportion the contributions of different sources to the  $\sum_{25}$ OCPs concentration for a given soil using the factor scores of PCs as the independent variables and the  $\sum_{25}$ OCPs concentration as the dependent variable. In this case, the independent variables' nonlinearities are ensured by using PCs' factor scores as the independent variables. A variable can only enter the regression equation during the stepwise procedure if it significantly increases the correlation (a default significance of 0.05 was used). The existing variable can only stay in the equation if its significance was higher than 0.10 [1]. The regression coefficients in the equation indicate the percent contributions of different sources.

Table S0-1. Results of Kaiser-Meyer-Olkin and Bartlett's Test for the original OCP data.

|                                                  |                    |        |
|--------------------------------------------------|--------------------|--------|
| Kaiser-Meyer-Olkin measure of sampling adequacy. |                    | 0.63   |
| Bartlett's Test of Sphericity                    | Approx. Chi-Square | 51.881 |
|                                                  | df                 | 28     |
|                                                  | Sig.               | 0.004  |

## Text S2. Carcinogenic risk calculation

People exposure to OCPs in soil mainly via ingestion, dermal contact, and inhalation. According to the US EPA Exposure Factors Handbook – 1997 [2], the incremental lifetime risk of cancer (ICLR) for human exposure to chemical  $i$  via three ways were estimated as followed [3]:

$$ICLR_{\text{ingestion-}i} = \frac{C_{\text{soil}} \times IR_{\text{ingestion}} \times EF \times ED}{BW \times AT} \times CF \times SF \quad (1)$$

$$ICLR_{\text{dermal contact-}i} = \frac{C_{\text{soil}} \times SA \times AF \times ABS \times EF \times ED}{BW \times AT} \times CF \times SF \quad (2)$$

$$ICLR_{\text{inhalation-}i} = \frac{C_{\text{soil}} \times IR_{\text{inhalation}} \times EF \times ED \times \frac{1}{PEF}}{BW \times AT} \times SF \quad (3)$$

Where  $C_{\text{soil}}$  is the contaminant concentration in the soil (mg/kg),  $IR_{\text{ingestion}}$  is the ingestion rate of soil (mg/day),  $EF$  is the exposure frequency to contaminated soil (days/year),  $ED$  is the exposure duration to contaminated soil (years),  $CF$  is the conversion factor ( $1 \times 10^{-6}$  kg/mg),  $BW$  is body weight (kg),  $AT$  is the average lifetime (days),  $SF$  is the carcinogenic slope factor (chemical specific,  $1/(\text{mg/kg/day})$ ),  $SA$  is skin surface area exposure to contaminants ( $\text{cm}^2$ ),  $AF$  is the skin adherence factor for soil (mg/cm),  $ABS$  is the dermal absorption factor from soil (chemical specific),  $IR_{\text{inhalation}}$  is the inhalation rate ( $\text{m}^3/\text{day}$ ), and  $PEF$  is the particulate emission factor ( $1.36 \times 10^9 \text{ m}^3/\text{kg}$ ).

The risk exposure to 25 OCP compounds through all exposure pathways ( $ICLR_{\text{total}}$ ) was then calculated as:

$$ICLR_{\text{total}} = \sum_{i=1}^{25} (ICLR_{\text{ingestion-}i} + ICLR_{\text{dermal contact-}i} + ICLR_{\text{inhalation-}i}) \quad (4)$$

In this study,  $ICLR_{\text{total}}$  in the soil was assessed for three population groups: children (3 – 10 years old), adolescents (11 – 18 years old), and adults (19 – 64 years old). Furthermore, risks of males and females were estimated separately in each group. Values of  $SF$  and  $ABS$  for each OCP compound were presented in Table S0-2, and other parameters used for  $ICLR$  calculations in this study were showed in Table S0-3.

Table S0-2. Slope factors ( $SF$ ,  $1/(\text{mg/kg/day})$ ) and dermal absorption factors ( $ABS$ , unitless) for target OCP compounds.

| Compound                | $SF^a$ | $ABS^b$                 |
|-------------------------|--------|-------------------------|
| HCB                     | 1.6    |                         |
| $\alpha$ -HCH           | 6.3    | 0.1                     |
| $\beta$ -HCH            | 1.8    | 0.1                     |
| $\gamma$ -HCH           | 1.3    | 0.04                    |
| $\delta$ -HCH           |        |                         |
| $p,p'$ -DDT             | 0.34   | 0.03                    |
| $o,p'$ -DDT             | 0.34   | <b>0.03<sup>c</sup></b> |
| $p,p'$ -DDE             | 0.34   |                         |
| $o,p'$ -DDE             | 0.34   |                         |
| $p,p'$ -DDD             | 0.24   | 0.1                     |
| $o,p'$ -DDD             | 0.24   | <b>0.1</b>              |
| <i>trans</i> -Chlordane | 0.35   | 0.04                    |
| <i>cis</i> -Chlordane   | 0.35   | <b>0.04</b>             |

|                      |     |     |
|----------------------|-----|-----|
| Heptachlor           | 4.5 |     |
| Heptachlor-epoxide   | 9.1 |     |
| $\alpha$ -Endosulfan |     |     |
| $\beta$ -Endosulfan  |     |     |
| Endosulfan sulfate   |     | 0.1 |
| Aldrin               | 17  |     |
| Dieldrin             |     | 0.1 |
| Endrin               |     | 0.1 |
| Endrin aldehyde      |     |     |
| Endrin ketone        |     |     |
| Mirex                |     |     |
| Methoxychlor         |     | 0.1 |

---

<sup>a</sup>Data from U.S. EPA ([http://www.popstoolkit.com/tools/HHRA/SF\\_USEPA.aspx](http://www.popstoolkit.com/tools/HHRA/SF_USEPA.aspx))

<sup>b</sup>Data from Regional Screening Level (RSL) Summary Table [4]

<sup>c</sup>Bold values came from the values for their corresponding isomers.

Table S0-3. Parameters used for the assessment of the incremental lifetime cancer risk.

| Parameters                                  | Unit                | Children<br>(3-10 years old) |                      | Adolescence<br>(11-18 years old) |                      | Adults<br>(19-64 years old) |                      | References |
|---------------------------------------------|---------------------|------------------------------|----------------------|----------------------------------|----------------------|-----------------------------|----------------------|------------|
|                                             |                     | Male                         | Female               | Male                             | Female               | Male                        | Female               |            |
| Body weight (BW) <sup>a</sup>               | kg                  | 34.0                         | 32.7                 | 51.0                             | 47.9                 | 68.0                        | 57.5                 | [5]        |
| Ingestion rate (IR <sub>Ingestion</sub> )   | mg/day              | 200                          | 200                  | 100                              | 100                  | 100                         | 100                  | [6]        |
| Exposure frequency (EF)                     | days/year           | 350                          | 350                  | 350                              | 350                  | 350                         | 350                  | [6]        |
| Exposure duration (ED)                      | years               | 6                            | 6                    | 14                               | 14                   | 30                          | 30                   | [7]        |
| Lifetime (LT)                               | years               | 73.6                         | 79.4                 | 73.6                             | 79.4                 | 73.6                        | 79.4                 | [8]        |
| Average life span (AT)                      | days                | LT×365                       | LT×365               | LT×365                           | LT×365               | LT×365                      | LT×365               | [6]        |
| Skin surface area (SA)                      | cm <sup>2</sup>     | 2,800                        | 2,800                | 2,800                            | 2,800                | 5,700                       | 5,700                | [6]        |
| Dermal surface factor (AF)                  | mg/cm               | 0.2                          | 0.2                  | 0.2                              | 0.2                  | 0.07                        | 0.07                 | [6]        |
| Inhalation rate (IR <sub>Inhalation</sub> ) | m <sup>3</sup> /day | 8.4                          | 8.4                  | 13.1                             | 13.1                 | 14.8                        | 14.8                 | [9]        |
| Particle emission factor (PEF)              | m <sup>3</sup> /kg  | 1.36×10 <sup>9</sup>         | 1.36×10 <sup>9</sup> | 1.36×10 <sup>9</sup>             | 1.36×10 <sup>9</sup> | 1.36×10 <sup>9</sup>        | 1.36×10 <sup>9</sup> | [6]        |

<sup>a</sup>Body weights were calculated based on the investigation data during 2006-2011.

Table S1. The OCP concentrations (pg/g dw) in the study karst soil.

| Compounds               | MDL | Range       | Median | Mean±SD     | Detection rate | References values     |                     |
|-------------------------|-----|-------------|--------|-------------|----------------|-----------------------|---------------------|
|                         |     |             |        |             |                | Dutch*                | China**             |
| HCB                     | 15  | <MDL-1,440  | 172    | 278±316     | 88.9%          |                       |                     |
| $\alpha$ -HCH           | 4   | <MDL-95.8   | 18.3   | 26.8±26.1   | 85.2%          | 1.70×10 <sup>7</sup>  |                     |
| $\beta$ -HCH            | 5   | 6.31-398    | 33.4   | 75.6±96.6   | 100%           | 1.60×10 <sup>6</sup>  |                     |
| $\gamma$ -HCH           | 3   | <MDL-174    | 28.4   | 40.1±38.0   | 96.3%          | 1.20×10 <sup>6</sup>  |                     |
| $\delta$ -HCH           | 2   | <MDL-414    | 12.5   | 41.3±85.4   | 81.5%          |                       |                     |
| <i>p,p'</i> -DDT        | 3   | <MDL-29,200 | 406    | 1,640±5,560 | 92.6%          | 1.70×10 <sup>6a</sup> |                     |
| <i>o,p'</i> -DDT        | 2   | <MDL-3,690  | 2.99   | 189±708     | 55.6%          |                       |                     |
| <i>p,p'</i> -DDE        | 3   | <MDL-4,610  | 16.7   | 346±942     | 77.8%          | 2.30×10 <sup>6b</sup> |                     |
| <i>o,p'</i> -DDE        | 2   | <MDL-1,350  | 28.2   | 128±288     | 74.1%          |                       |                     |
| <i>p,p'</i> -DDD        | 3   | <MDL-479    | 33.5   | 74.1±115    | 88.9%          | 3.40×10 <sup>6c</sup> |                     |
| <i>o,p'</i> -DDD        | 2   | <MDL-901    | 20.0   | 111±195     | 66.7%          |                       |                     |
| <i>trans</i> -Chlordane | 1   | <MDL-48.3   | <MDL   | 7.09±11.5   | 40.7%          | 4.0×10 <sup>6</sup>   |                     |
| <i>cis</i> -Chlordane   | 2   | <MDL-7,060  | 17.9   | 296±1,350   | 74.1%          |                       |                     |
| Heptachlor              | 2   | <MDL-62.9   | 4.77   | 10.9±14.7   | 59.3%          | 4.0×10 <sup>6</sup>   |                     |
| Heptachlor-epoxide      | 2   | <MDL-131    | 4.09   | 16.1±33.8   | 66.7%          | 4.0×10 <sup>6</sup>   |                     |
| $\alpha$ -Endosulfan    | 6   | <MDL-174    | 9.71   | 28.4±43.4   | 70.4%          | 4.0×10 <sup>6</sup>   |                     |
| $\beta$ -Endosulfan     | 4   | <MDL-501    | 11.4   | 73.2±125    | 74.1%          |                       |                     |
| Endosulfan sulfate      | 20  | <MDL-1,720  | 41.4   | 182±376     | 81.5%          |                       |                     |
| Aldrin                  | 5   | <MDL-1,740  | 78.2   | 172±350     | 85.2%          | 3.2×10 <sup>5</sup>   |                     |
| Dieldrin                | 6   | <MDL-1,490  | 20.6   | 116±302     | 74.1%          |                       |                     |
| Endrin                  | 8   | <MDL-118    | 1.34   | 20.6±35.9   | 37.0%          |                       |                     |
| Endrin aldehyde         | 2   | <MDL-71.4   | <MDL   | 5.22±14.4   | 29.6%          |                       |                     |
| Endrin ketone           | 3   | <MDL-17.4   | <MDL   | 0.64±3.34   | 3.70%          |                       |                     |
| Mirex                   | 3   | <MDL-9,300  | 1,090  | 1,410±1,720 | 92.6%          |                       |                     |
| Methoxychlor            | 3   | <MDL-27,700 | <MDL   | 1,130±5,310 | 48.2%          |                       |                     |
| $\Sigma$ HCHs           |     | 18.2-549    | 108    | 184±161     | 100%           |                       | 1.0×10 <sup>5</sup> |
| $\Sigma$ DDTs           |     | 25.6-39,500 | 659    | 2,490±7,480 | 100%           |                       | 1.0×10 <sup>5</sup> |
| $\Sigma$ CHLs           |     | 1.09-7,060  | 66.1   | 330±1,350   | 100%           |                       |                     |
| $\Sigma$ ENDOs          |     | <MDL-2,400  | 81.7   | 284±507     | 96.3%          |                       |                     |
| $\Sigma$ DRINs          |     | 9.42-1,930  | 183    | 314±452     | 100%           | 4.0×10 <sup>6</sup>   |                     |
| $\Sigma_{25}$ OCPs      |     | 161-43,100  | 3,850  | 6,410±9,620 | 100%           |                       |                     |

\*Dutch intervention values for soil remediation [10].

\*\*Data from [State Administration for Market Regulation, Ministry of Ecology and Environment, PRC \(2018\)](#).<sup>a</sup>This value was for the sum of *p,p'*-DDT and *o,p'*-DDT.<sup>b</sup>This value was for the sum of *p,p'*-DDE and *o,p'*-DDE.<sup>c</sup>This value was for the sum of *p,p'*-DDD and *o,p'*-DDD.

Table S2. Comparisons of OCPs (pg/g dw) in the agricultural soil between the study karst area and other areas around the world.

| Locations                       | HCB                          | ΣHCHs                     | ΣDDTs                 | ΣCHLs            | ΣENDOs           | ΣDRINs           | Mirex            | Methoxychlor      | Years     | References |
|---------------------------------|------------------------------|---------------------------|-----------------------|------------------|------------------|------------------|------------------|-------------------|-----------|------------|
| Zigui karst area, Central China | <15-1,440 (278) <sup>a</sup> | 18.2-549 (184)            | 25.6-39,500 (2,490)   | 1.09-7,060 (330) | <30-2,400 (284)  | 9.42-1,930 (314) | <3-9,300 (1,410) | <3-27,700 (1,130) | 2019      | This study |
| Tibet Plateau, West China       | (22)                         | (393)                     | (1,050)               | (179)            | (146)            |                  | (23)             |                   | 2010      | [12]       |
| Pearl River Delta, South China  |                              | <MDL <sup>b</sup> -24,100 | 520-414,000           |                  |                  |                  |                  |                   | 2002      | [13]       |
| Sichuan Basin, Southwest China  | 240-421 (330)                | 369-3,190 (1,780)         | 1,870-25,200 (13,500) | 0.48-5.71 (3.10) | 4.83-78.3 (41.5) | <6.76            |                  | <0.87-3.56 (1.78) | 2015      | [14]       |
| Indus River Basin, Pakistan     | 400-1,900                    | 7,000-27,000              | 54,000-320,000        | 1,700-16,000     | 500-2,700        |                  |                  |                   | 2013      | [3]        |
| Central Germany                 | 570-3,750                    | 460-11,500                | 23,700-173,000        |                  |                  |                  |                  |                   | 1995-1996 | [15]       |

<sup>a</sup>Concentration range (average)

<sup>b</sup>Method detection limit



Table S3. Spearman correlation coefficients between OCP groups.

|                | HCB    | $\Sigma$ HCHs | $\Sigma$ DDTs | $\Sigma$ CHLs | $\Sigma$ ENDOs | $\Sigma$ DRINs | Mirex |
|----------------|--------|---------------|---------------|---------------|----------------|----------------|-------|
| $\Sigma$ HCHs  | 0.409* |               |               |               |                |                |       |
| $\Sigma$ DDTs  | 0.437* | 0.654**       |               |               |                |                |       |
| $\Sigma$ CHLs  | -0.034 | 0.321         | 0.334         |               |                |                |       |
| $\Sigma$ ENDOs | -0.192 | 0.452*        | 0.392*        | 0.631**       |                |                |       |
| $\Sigma$ DRINs | 0.256  | 0.615**       | 0.445*        | 0.360         | 0.360          |                |       |
| Mirex          | -0.180 | -0.215        | -0.178        | -0.277        | 0.070          | -0.077         |       |
| Methoxychlor   | 0.108  | -0.229        | 0.026         | 0.058         | 0.075          | 0.084          | 0.206 |

\*Correlation is significant at the 0.05 level (2-tailed).

\*\*Correlation is significant at the 0.01 level (2-tailed).

Table S4. OCP concentrations in different land-use types.

| Groups          | Orchard (n=7) |        |                            | Vegetable land (n=20)    |        |                   | Asymp. Sig. of<br>Kruskal-Wallis<br>Test |
|-----------------|---------------|--------|----------------------------|--------------------------|--------|-------------------|------------------------------------------|
|                 | Range         | Median | Mean $\pm$ SD <sup>a</sup> | Range                    | Median | Mean $\pm$ SD     |                                          |
| HCB             | 16.7-557      | 92.6   | 205 $\pm$ 213              | <MDL <sup>b</sup> -1,430 | 179    | 303 $\pm$ 345     | 0.543                                    |
| $\Sigma$ HCHs   | 20.0-260      | 154    | 148 $\pm$ 100              | 18.2-549                 | 108    | 196 $\pm$ 177     | 0.825                                    |
| $\Sigma$ DDTs   | 25.6-3,630    | 1,700  | 1,710 $\pm$ 1,580          | 56.8-39,500              | 625    | 2,760 $\pm$ 8,690 | 0.740                                    |
| $\Sigma$ CHLs   | 1.09-201      | 32.7   | 63.4 $\pm$ 69.1            | 6.56-7,060               | 72.0   | 423 $\pm$ 1,560   | 0.347                                    |
| $\Sigma$ ENDOs  | 11.5-1,010    | 102    | 260 $\pm$ 357              | <MDL-2,390               | 63.4   | 293 $\pm$ 557     | 0.619                                    |
| $\Sigma$ DRINs  | 9.42-623      | 183    | 214 $\pm$ 209              | 12.1-1,930               | 180    | 349 $\pm$ 510     | 0.782                                    |
| Mirex           | <MDL-9,300    | 1,290  | 2,400 $\pm$ 3,160          | <MDL-2,540               | 1,030  | 1,060 $\pm$ 630   | 0.234                                    |
| Methoxychlor    | <MDL-27,700   | <MDL   | 4,000 $\pm$ 10,400         | <MDL 1,310               | 4.27   | 123 $\pm$ 294     | 0.905                                    |
| $\Sigma$ 25OCPs | 161-34,300    | 4,760  | 9,000 $\pm$ 11,500         | 1,560-43,100             | 3,310  | 5,510 $\pm$ 9,020 | 0.203                                    |

<sup>a</sup>Standard derivation<sup>b</sup>Method detection limitTable S5. Rotated component matrix<sup>a</sup>

|       | PC1                      | PC2           | PC3    |
|-------|--------------------------|---------------|--------|
| HCB   | <b>0.539<sup>b</sup></b> | <b>-0.586</b> | 0.341  |
| HCHs  | <b>0.825</b>             | 0.269         | -0.183 |
| DDTs  | <b>0.860</b>             | 0.012         | 0.169  |
| CHLs  | 0.323                    | <b>0.639</b>  | 0.142  |
| ENDOs | 0.295                    | <b>0.813</b>  | -0.084 |
| DRINs | <b>0.749</b>             | 0.236         | -0.069 |

|              |        |        |              |
|--------------|--------|--------|--------------|
| Mirex        | -0.173 | 0.467  | <b>0.591</b> |
| Methoxychlor | 0.066  | -0.127 | <b>0.800</b> |

<sup>a</sup>Rotation method was varimax with Kaiser normalization and rotation converged in 6 iterations.

<sup>b</sup>Bold values were the high and median loadings.

Table S6. The summary of the MLRA model for the OCP data in the study karst soil.

| R     | R Square | Adjusted R Square | Std. error of the estimate |
|-------|----------|-------------------|----------------------------|
| 0.675 | 0.456    | 0.412             | 0.75249437                 |

Table S7. The ANOVA result for the MLRA.

|            | Sum of Squares | df | Mean Square | F      | Sig.  |
|------------|----------------|----|-------------|--------|-------|
| Regression | 11.844         | 2  | 5.922       | 10.458 | 0.001 |
| Residual   | 14.156         | 25 | 0.566       |        |       |
| Total      | 26.000         | 27 |             |        |       |

Table S8. The coefficients for the regression equation by MLRA

|                  | Unstandardized Coefficients |       | Standardized Coefficients | t     | Sig.  | 95.0% Confidence Interval for B |             |
|------------------|-----------------------------|-------|---------------------------|-------|-------|---------------------------------|-------------|
|                  | B                           | Std.  |                           |       |       | Lower Bound                     | Upper Bound |
| PCS <sub>1</sub> | 0.566                       | 0.148 | 0.566                     | 3.833 | 0.001 | 0.262                           | 0.87        |
| PCS <sub>3</sub> | 0.368                       | 0.148 | 0.368                     | 2.495 | 0.020 | 0.064                           | 0.672       |

Table S9. The incremental lifetime cancer risk exposure to OCPs in the karst soil.

| Soil samples | Children<br>(3-10 years old) |                       | Adolescence<br>(11-18 years old) |                       | Adults<br>(19-64 years old) |                       |
|--------------|------------------------------|-----------------------|----------------------------------|-----------------------|-----------------------------|-----------------------|
|              | Males                        | Females               | Males                            | Females               | Males                       | Females               |
| S01          | 3.36×10 <sup>-9</sup>        | 3.23×10 <sup>-9</sup> | 2.69×10 <sup>-9</sup>            | 2.65×10 <sup>-9</sup> | 4.25×10 <sup>-9</sup>       | 4.66×10 <sup>-9</sup> |
| S02          | 1.48×10 <sup>-9</sup>        | 1.42×10 <sup>-9</sup> | 1.20×10 <sup>-9</sup>            | 1.19×10 <sup>-9</sup> | 1.89×10 <sup>-9</sup>       | 2.07×10 <sup>-9</sup> |
| S03          | 1.67×10 <sup>-9</sup>        | 1.61×10 <sup>-9</sup> | 1.65×10 <sup>-9</sup>            | 1.63×10 <sup>-9</sup> | 2.33×10 <sup>-9</sup>       | 2.56×10 <sup>-9</sup> |

|     |                        |                        |                        |                        |                        |                        |
|-----|------------------------|------------------------|------------------------|------------------------|------------------------|------------------------|
| S04 | $1.71 \times 10^{-10}$ | $1.65 \times 10^{-10}$ | $1.42 \times 10^{-10}$ | $1.40 \times 10^{-10}$ | $2.20 \times 10^{-10}$ | $2.41 \times 10^{-10}$ |
| S05 | $4.99 \times 10^{-10}$ | $4.81 \times 10^{-10}$ | $3.92 \times 10^{-10}$ | $3.87 \times 10^{-10}$ | $6.26 \times 10^{-10}$ | $6.87 \times 10^{-10}$ |
| S06 | $1.79 \times 10^{-9}$  | $1.73 \times 10^{-9}$  | $1.44 \times 10^{-9}$  | $1.42 \times 10^{-9}$  | $2.27 \times 10^{-9}$  | $2.49 \times 10^{-9}$  |
| S07 | $1.15 \times 10^{-9}$  | $1.11 \times 10^{-9}$  | $9.35 \times 10^{-10}$ | $9.23 \times 10^{-10}$ | $1.47 \times 10^{-9}$  | $1.61 \times 10^{-9}$  |
| S08 | $1.89 \times 10^{-9}$  | $1.82 \times 10^{-9}$  | $1.62 \times 10^{-9}$  | $1.60 \times 10^{-9}$  | $2.46 \times 10^{-9}$  | $2.70 \times 10^{-9}$  |
| S09 | $4.47 \times 10^{-9}$  | $4.30 \times 10^{-9}$  | $3.57 \times 10^{-9}$  | $3.52 \times 10^{-9}$  | $5.65 \times 10^{-9}$  | $6.19 \times 10^{-9}$  |
| S10 | $1.36 \times 10^{-9}$  | $1.31 \times 10^{-9}$  | $1.11 \times 10^{-9}$  | $1.10 \times 10^{-9}$  | $1.74 \times 10^{-9}$  | $1.91 \times 10^{-9}$  |
| S11 | $1.46 \times 10^{-8}$  | $1.41 \times 10^{-8}$  | $1.14 \times 10^{-8}$  | $1.13 \times 10^{-8}$  | $1.83 \times 10^{-8}$  | $2.01 \times 10^{-8}$  |
| S12 | $1.30 \times 10^{-9}$  | $1.25 \times 10^{-9}$  | $1.11 \times 10^{-9}$  | $1.10 \times 10^{-9}$  | $1.69 \times 10^{-9}$  | $1.86 \times 10^{-9}$  |
| S13 | $8.35 \times 10^{-10}$ | $8.05 \times 10^{-10}$ | $6.64 \times 10^{-10}$ | $6.55 \times 10^{-10}$ | $1.05 \times 10^{-9}$  | $1.16 \times 10^{-9}$  |
| S14 | $4.72 \times 10^{-10}$ | $4.55 \times 10^{-10}$ | $4.30 \times 10^{-10}$ | $4.25 \times 10^{-10}$ | $6.33 \times 10^{-10}$ | $6.94 \times 10^{-10}$ |
| S15 | $1.08 \times 10^{-8}$  | $1.04 \times 10^{-8}$  | $1.09 \times 10^{-8}$  | $1.07 \times 10^{-8}$  | $1.52 \times 10^{-8}$  | $1.66 \times 10^{-8}$  |
| S16 | $1.53 \times 10^{-9}$  | $1.48 \times 10^{-9}$  | $1.67 \times 10^{-9}$  | $1.65 \times 10^{-9}$  | $2.25 \times 10^{-9}$  | $2.46 \times 10^{-9}$  |
| S17 | $9.64 \times 10^{-10}$ | $9.29 \times 10^{-10}$ | $7.74 \times 10^{-10}$ | $7.64 \times 10^{-10}$ | $1.22 \times 10^{-9}$  | $1.34 \times 10^{-9}$  |
| S18 | $2.05 \times 10^{-9}$  | $1.98 \times 10^{-9}$  | $1.85 \times 10^{-9}$  | $1.83 \times 10^{-9}$  | $2.74 \times 10^{-9}$  | $3.01 \times 10^{-9}$  |
| S19 | $2.99 \times 10^{-9}$  | $2.88 \times 10^{-9}$  | $3.17 \times 10^{-9}$  | $3.13 \times 10^{-9}$  | $4.32 \times 10^{-9}$  | $4.73 \times 10^{-9}$  |
| S20 | $9.87 \times 10^{-11}$ | $9.52 \times 10^{-11}$ | $8.82 \times 10^{-11}$ | $8.76 \times 10^{-11}$ | $1.31 \times 10^{-10}$ | $1.44 \times 10^{-10}$ |
| S21 | $5.99 \times 10^{-9}$  | $5.77 \times 10^{-9}$  | $4.71 \times 10^{-9}$  | $4.65 \times 10^{-9}$  | $7.52 \times 10^{-9}$  | $8.25 \times 10^{-9}$  |
| S22 | $1.60 \times 10^{-9}$  | $1.54 \times 10^{-9}$  | $1.45 \times 10^{-9}$  | $1.43 \times 10^{-9}$  | $2.14 \times 10^{-9}$  | $2.35 \times 10^{-9}$  |
| S23 | $1.52 \times 10^{-9}$  | $1.46 \times 10^{-9}$  | $1.30 \times 10^{-9}$  | $1.29 \times 10^{-9}$  | $1.98 \times 10^{-9}$  | $2.17 \times 10^{-9}$  |
| S24 | $1.59 \times 10^{-9}$  | $1.53 \times 10^{-9}$  | $1.29 \times 10^{-9}$  | $1.27 \times 10^{-9}$  | $2.02 \times 10^{-9}$  | $2.21 \times 10^{-9}$  |
| S25 | $1.05 \times 10^{-9}$  | $1.01 \times 10^{-9}$  | $8.99 \times 10^{-10}$ | $8.88 \times 10^{-10}$ | $1.37 \times 10^{-9}$  | $1.50 \times 10^{-9}$  |
| S26 | $9.73 \times 10^{-10}$ | $9.37 \times 10^{-10}$ | $8.29 \times 10^{-10}$ | $8.18 \times 10^{-10}$ | $1.27 \times 10^{-9}$  | $1.39 \times 10^{-9}$  |
| S27 | $1.77 \times 10^{-9}$  | $1.70 \times 10^{-9}$  | $1.57 \times 10^{-9}$  | $1.55 \times 10^{-9}$  | $2.34 \times 10^{-9}$  | $2.57 \times 10^{-9}$  |

---

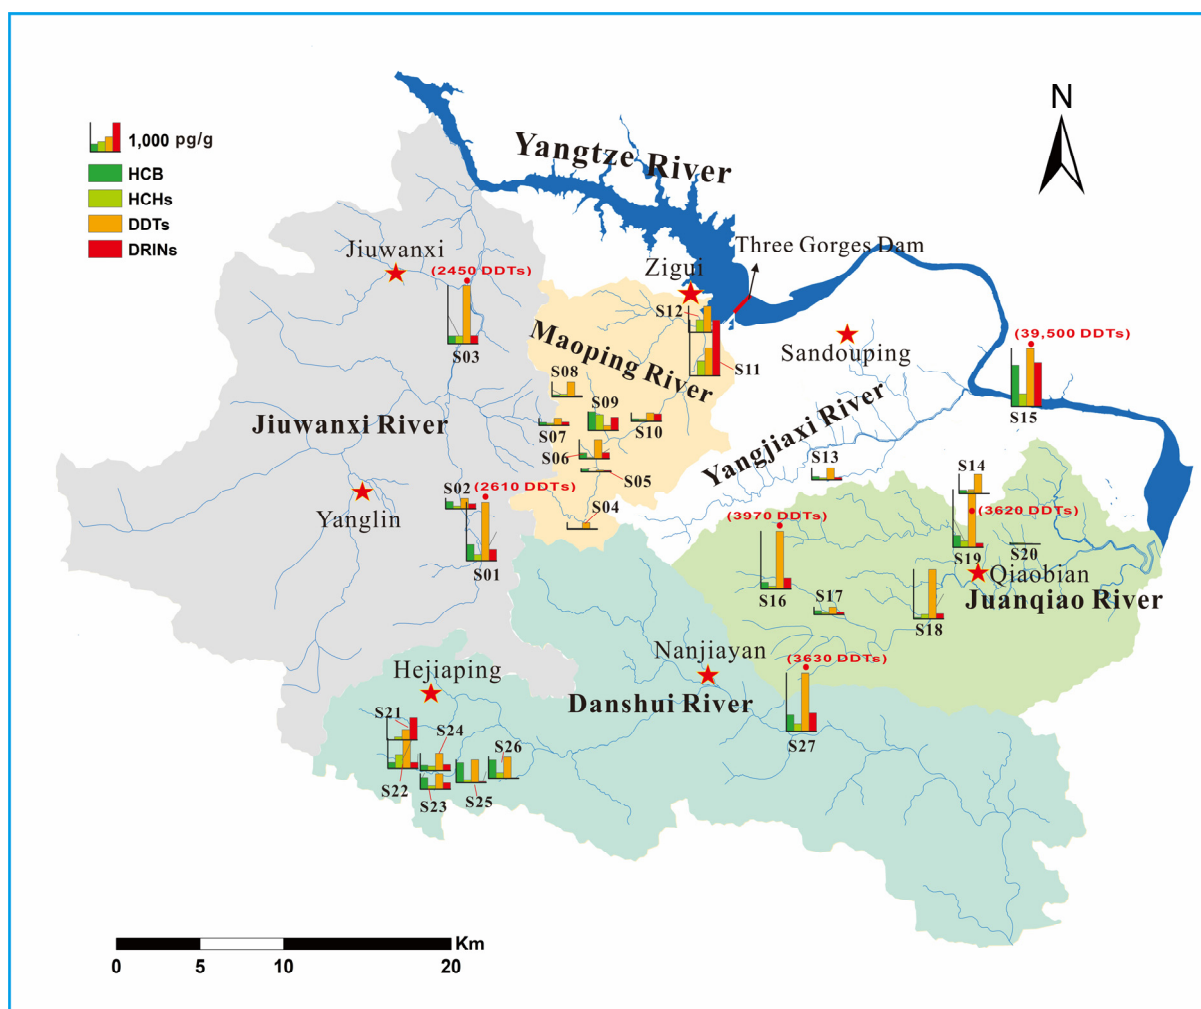

Figure S1. Spatial distributions of HCB, HCHs, DDTs, and DRINs in different river basins.

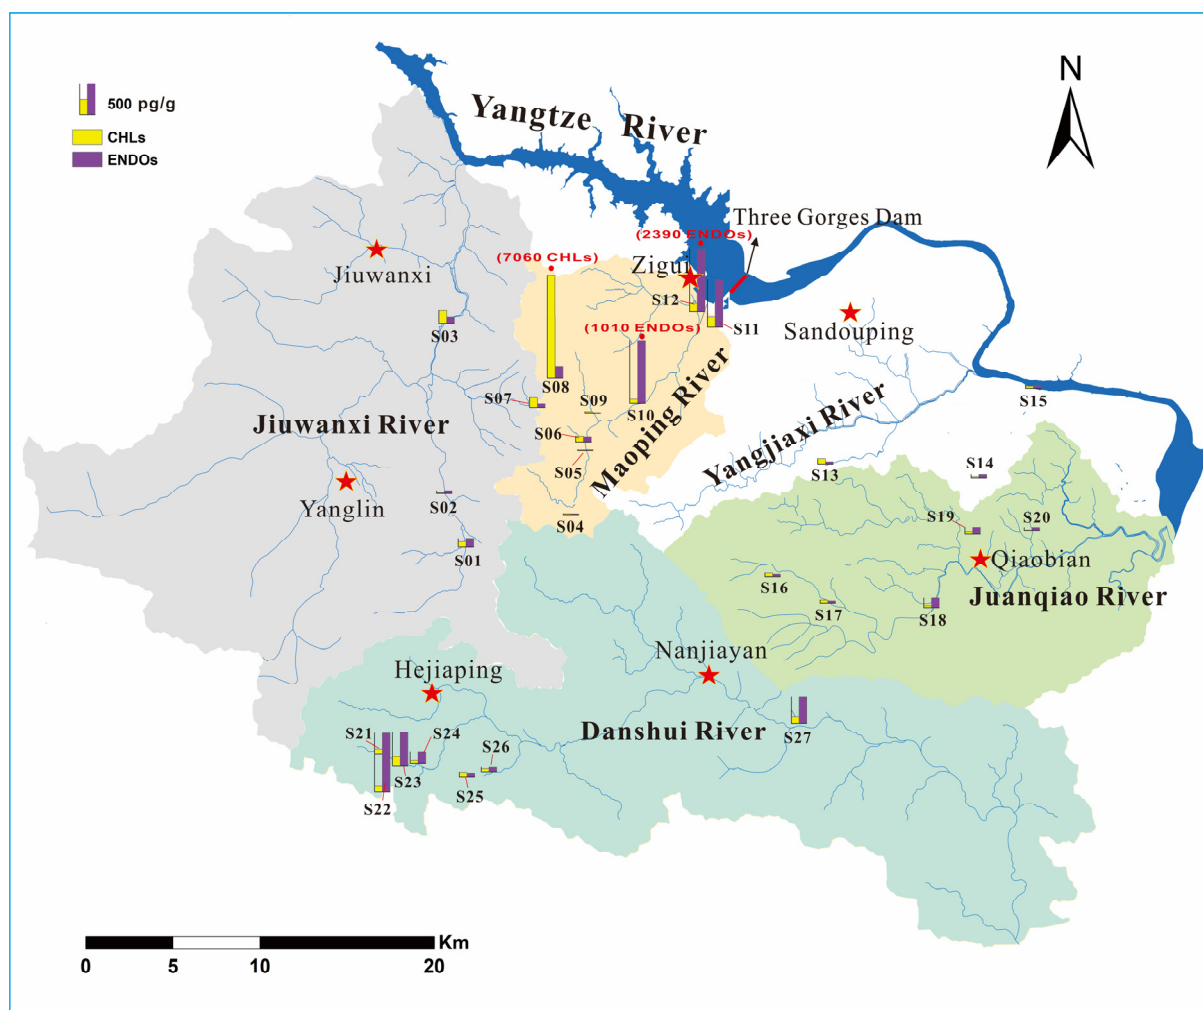

**Figure S2.** Spatial distributions of CHLs and ENDs in different river basins.

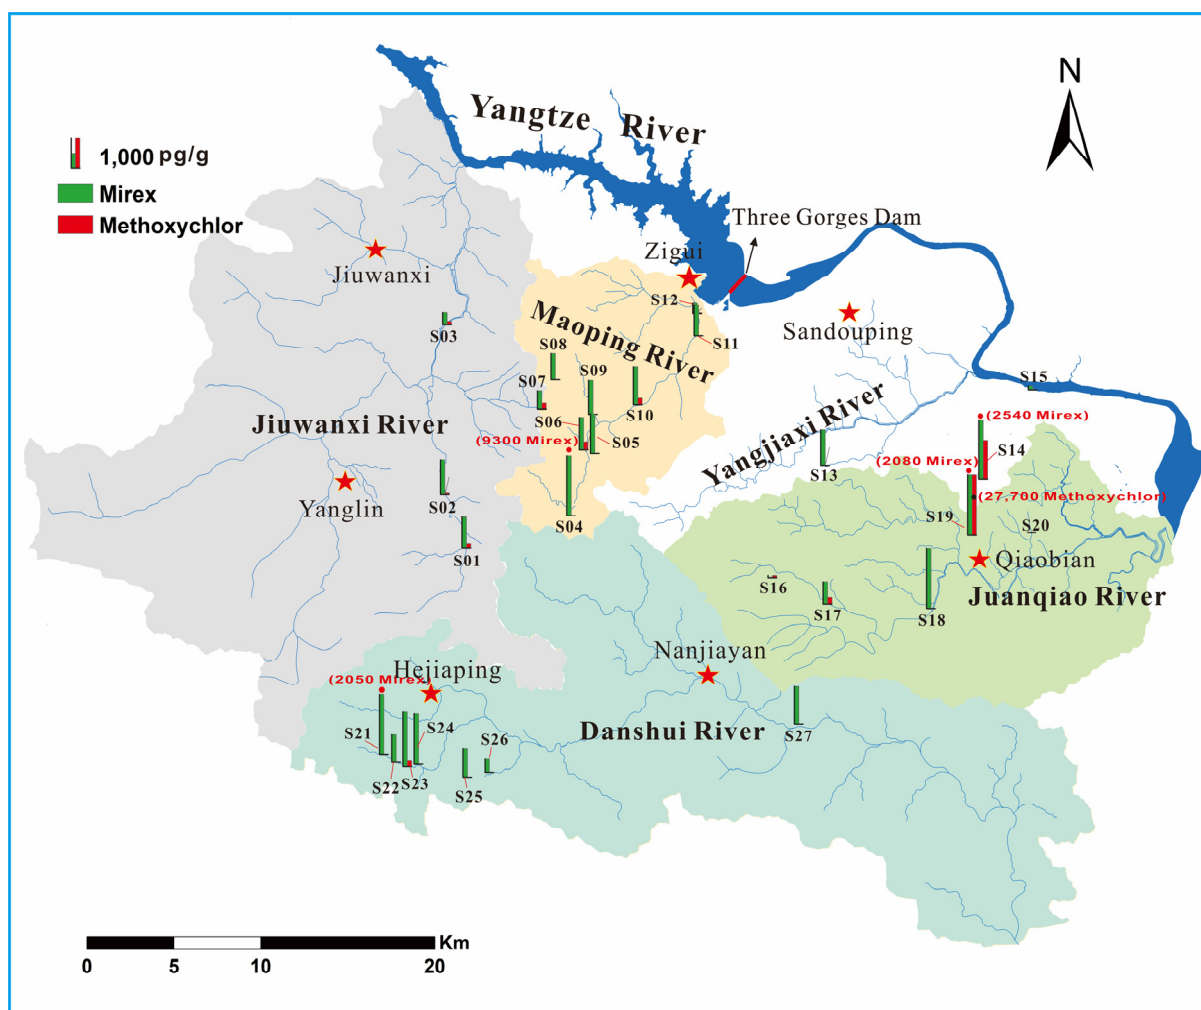

Figure S3. Spatial distributions of Mirex and Methoxychlor in different river basins.

(a) OCPs

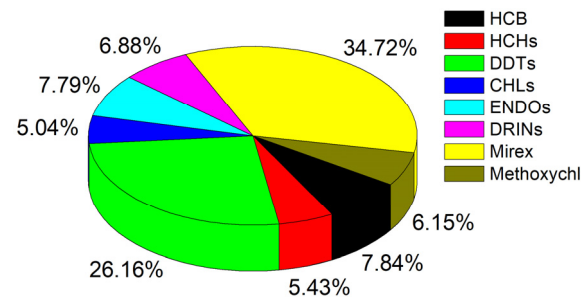

(b) HCHs

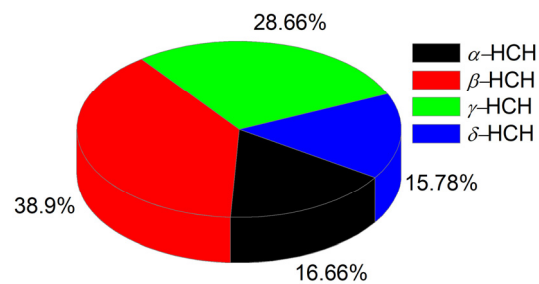

(c) DDTs

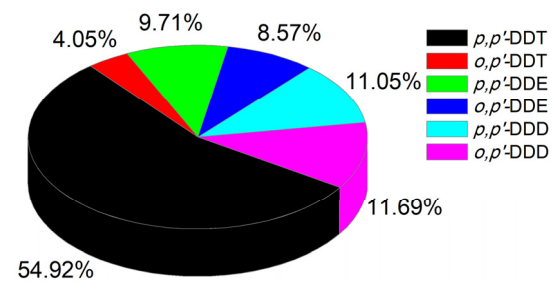

(d) CHLs

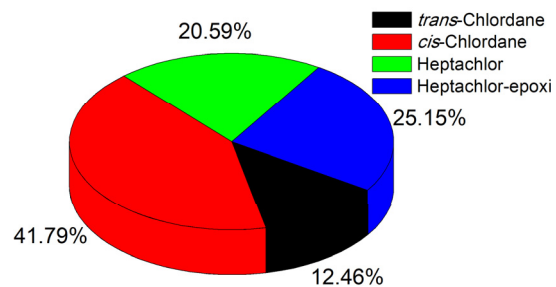

(e) ENDOs

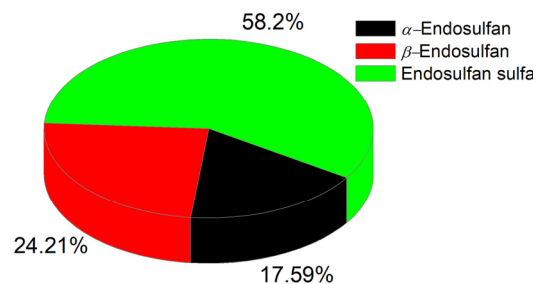

(f) DRINs

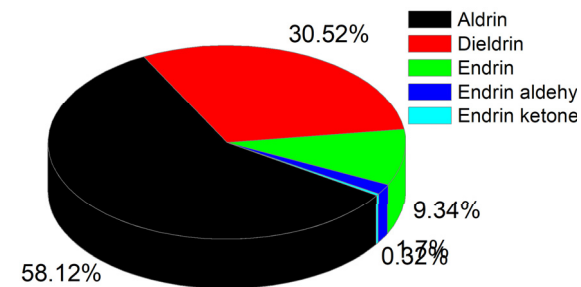

Figure S4. The OCP compositions in the soil from the study karst area.

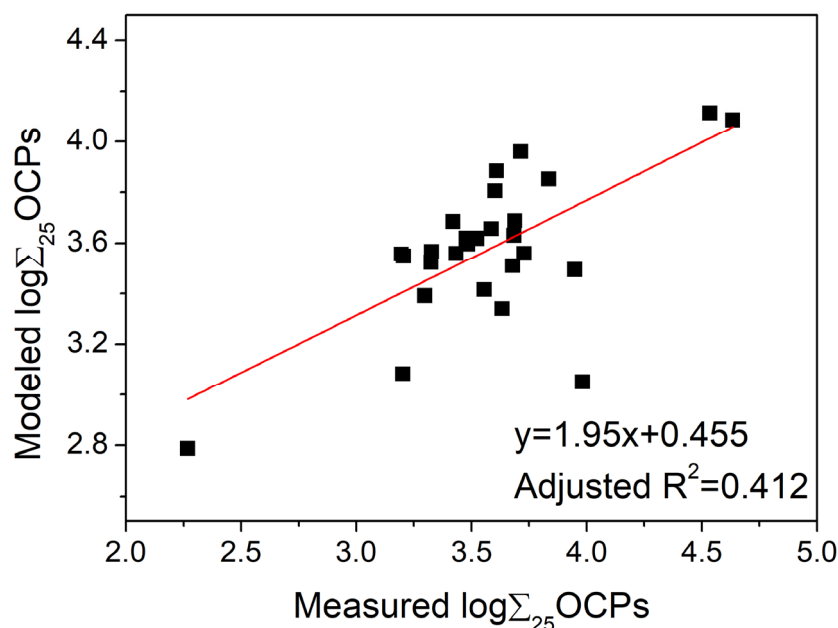

Figure S5. The linear fit between the measured  $\log \Sigma_{25} \text{OCPs}$  and modeled  $\log \Sigma_{25} \text{OCPs}$  by the MLRA.

## References

1. Larsen, R.K.; Baker, J.E. Source Apportionment of Polycyclic Aromatic Hydrocarbons in the Urban Atmosphere: A Comparison of Three Methods. *Environ. Sci. Technol.* **2003**, *37*, 1873–1881, doi:10.1021/es0206184.
2. U.S. EPA *Exposure Factors Handbook (1997, Final Report)*; U.S. Environmental Protection Agency, Washington, DC, EPA/600/P-95/002F a-c, 1997;
3. Sultana, J.; Syed, J.H.; Mahmood, A.; Ali, U.; Rehman, M.Y.A.; Malik, R.N.; Li, J.; Zhang, G. Investigation of Organochlorine Pesticides from the Indus Basin, Pakistan: Sources, Air–Soil Exchange Fluxes and Risk Assessment. *Science of The Total Environment* **2014**, 497–498, 113–122, doi:10.1016/j.scitotenv.2014.07.066.
4. U.S. EPA Regional Screening Level (RSL) Summary Table (TR=1E-06, HQ=0.1) 2019.
5. National Physique Monitoring Center, PRC National Physique and Health Database Available online: <http://cnphd.bmicc.cn/chs/cn/analysis.php> (accessed on 26 January 2021).
6. U.S. DOE The Risk Assessment Information System Available online: <https://rais.ornl.gov/> (accessed on 26 January 2021).
7. Bill, B.; Juan, V.; Vishwanathan, A. Stochastic Risk Assessment of Sites Contaminated by Hazardous Wastes. *Journal of Environmental Engineering* **1998**, *124*, 380–388, doi:10.1061/(ASCE)0733-9372(1998)124:4(380).
8. NBS, PRC Average life expectancy Available online: <https://data.stats.gov.cn> (accessed on 26 January 2021).
9. Finley, B.; Proctor, D.; Scott, P.; Harrington, N.; Paustenbach, D.; Price, P. Recommended Distributions for Exposure Factors Frequently Used in Health Risk Assessment. *Risk Analysis* **1994**, *14*, 533–553.



10. Ministry of Housing, Spatial Planning and Environmental Management (Netherlands) Soil Remediation Circular 2009 2009.
11. State Administration for Market Regulation, Ministry of Ecology and Environment, PRC Soil Environmental Quality–Risk Control Standard for Soil Contamination of Agricultural Land (GB 15618-2018) 2018.
12. Chen, L.; Feng, Q.; He, Q.; Huang, Y.; Zhang, Y.; Jiang, G.; Zhao, W.; Gao, B.; Lin, K.; Xu, Z. Sources, Atmospheric Transport and Deposition Mechanism of Organochlorine Pesticides in Soils of the Tibetan Plateau. *Science of The Total Environment* **2017**, *577*, 405–412, doi:10.1016/j.scitotenv.2016.10.227.
13. Li, J.; Zhang, G.; Qi, S.; Li, X.; Peng, X. Concentrations, Enantiomeric Compositions, and Sources of HCH, DDT and Chlordane in Soils from the Pearl River Delta, South China. *Science of The Total Environment* **2006**, *372*, 215–224, doi:10.1016/j.scitotenv.2006.09.023.
14. Huang, H.; Ding, Y.; Chen, W.; Zhang, Y.; Chen, W.; Chen, Y.; Mao, Y.; Qi, S. Two-Way Long-Range Atmospheric Transport of Organochlorine Pesticides (OCPs) between the Yellow River Source and the Sichuan Basin, Western China. *Science of The Total Environment* **2019**, *651*, 3230–3240, doi:10.1016/j.scitotenv.2018.10.133.
15. Manz, M.; Wenzel, K.D.; Dietze, U.; Schüürmann, G. Persistent Organic Pollutants in Agricultural Soils of Central Germany. *Science of The Total Environment* **2001**, *277*, 187–198, doi:10.1016/S0048-9697(00)00877-9.
